# Supplementary material
Source: PubMed Central journal article supplement (PMC5108699)
Supplement: NIHMS788186-supplement-SI_PDF.pdf [file NIHMS788186-supplement-SI_PDF.pdf]

Supplementary data for

**Biological characterization of the hygrobafilomycin antibiotic JBIR-100 and bioinformatic insights into the hygrolide family of natural products.**

*Evelyn M. Molloy<sup>a,†</sup>, Jonathan I. Tietz<sup>b,†</sup>, Patricia M. Blair<sup>b</sup>, Douglas A. Mitchell<sup>a,b,c,\*</sup>*

<sup>a</sup>Carl R. Woese Institute for Genomic Biology, University of Illinois at Urbana-Champaign, Urbana, IL 61801, USA

<sup>b</sup>Department of Chemistry, University of Illinois at Urbana-Champaign, Urbana, IL 61801, USA

<sup>c</sup>Department of Microbiology, University of Illinois at Urbana-Champaign, Urbana, IL 61801, USA

\*Corresponding author. Tel.: +1-217-333-1345; Fax: +1-217-244-8024; Email: douglasm@illinois.edu

<sup>†</sup>These two authors contributed equally to this manuscript.

**Abbreviations**

Biosynthetic gene cluster, BGC; ketoreductase, KR.

**Table of Contents**

|                                                                                                |    |
|------------------------------------------------------------------------------------------------|----|
| Table S1. <sup>1</sup> H and <sup>13</sup> C NMR chemical shift assignments of JBIR-100.....   | 2  |
| Figure S1. Atom numbering, chemical shift assignments, correlations & J-values of JBIR-100 ... | 3  |
| Figure S2. <sup>1</sup> H NMR spectrum of JBIR-100 .....                                       | 4  |
| Figure S3. <sup>1</sup> H- <sup>1</sup> H DQF-COSY spectrum of JBIR-100.....                   | 5  |
| Figure S4. <sup>1</sup> H- <sup>1</sup> H TOCSY spectrum of JBIR-100 .....                     | 6  |
| Figure S5. <sup>1</sup> H- <sup>13</sup> C HSQC spectrum of JBIR-100.....                      | 7  |
| Figure S6. <sup>1</sup> H- <sup>13</sup> C HMBC spectrum of JBIR-100.....                      | 8  |
| Figure S7. Growth defects of JBIR-100-resistant <i>B. subtilis</i> mutants .....               | 9  |
| Figure S8. Representative plecomacrolide BGCs and their products.....                          | 10 |
| Figure S9. Stereospecificity prediction of KR domains .....                                    | 11 |
| Table S2. Accession numbers for hygrolide BGCs .....                                           | 12 |
| Figure S10. Phylogenetic tree of homologues from hygrolide/concanamycin BGCs .....             | 13 |
| Figure S11. Phylogenetic tree of hygrolide producers .....                                     | 14 |
| Table S3. Phylogenetic classification of known and predicted hygrolide BGCs .....              | 15 |

**Table S1.**  $^1\text{H}$  and  $^{13}\text{C}$  NMR chemical shift assignments of JBIR-100.

| Position | Group | $^{13}\text{C}$ $\delta$<br>(ppm) | $^1\text{H}$ $\delta$<br>(ppm) | m<br>(J, Hz)       | Position | Group | $^{13}\text{C}$ $\delta$<br>(ppm) | $^1\text{H}$ $\delta$<br>(ppm) | m<br>(J, Hz)             |
|----------|-------|-----------------------------------|--------------------------------|--------------------|----------|-------|-----------------------------------|--------------------------------|--------------------------|
| 1        | C=O   | 171.7                             | -                              | -                  | 15       | CH    | 75.6                              | 4.98                           | dd<br>(7.8, 1.6)         |
| 2        | C     | 121.3                             | -                              | -                  | 16       | CH    | 37.9                              | 2.08                           | m                        |
| 2-CH3    | CH3   | 12.6                              | 2.03                           | s                  | 16-CH3   | CH3   | 8.9                               | 0.84                           | d (6.5)                  |
| 3        | CH    | 146.7                             | 7.26                           | br s               | 17       | CH    | 70.3                              | 4.10                           | dd<br>(10.8, 1.9)        |
| 4        | C     | 133.3                             | -                              | -                  | 18       | CH    | 41.9                              | 1.79                           | qd<br>(7.1, 2.0)         |
| 4-CH3    | CH3   | 13.9                              | 1.98                           | s                  | 18-CH3   | CH3   | 5.8                               | 0.98                           | d (7.1)                  |
| 5        | CH    | 146.2                             | 5.96                           | d (8.7)            | 19       | C     | 98.8                              | -                              | -                        |
| 6        | CH    | 37.0                              | 2.55                           | dq<br>(7.1, 8.7)   | 20       | CH(a) | 39.0                              | 2.30                           | dd<br>(11.9, 4.8)        |
| 6-CH3    | CH3   | 16.7                              | 1.06                           | d (7.0)            |          | CH(b) |                                   | 1.31                           | t (11.6)                 |
| 7        | CH    | 79.8                              | 3.23                           | m                  | 21       | CH    | 74.8                              | 5.02                           | td<br>(10.9, 4.8)        |
| 8        | CH    | 40.2                              | 1.87                           | m                  | 22       | CH    | 37.9                              | 1.64                           | ddq (10.9,<br>10.5, 6.5) |
| 8-CH3    | CH3   | 20.8                              | 0.92                           | d (6.9)            | 22-CH3   | CH3   | 11.2                              | 0.83                           | d (6.2)                  |
| 9        | CH(a) | 41.1                              | 2.05                           | m                  | 23       | CH    | 75.7                              | 3.58                           | dd<br>(10.4, 2.2)        |
|          | CH(b) |                                   | 1.98                           | m                  | 24       | CH    | 27.8                              | 1.93                           | td<br>(6.8, 2.2)         |
| 10       | C     | 143.5                             | -                              | -                  | 25       | CH3   | 20.1                              | 0.94                           | d (6.9)                  |
| 10-CH3   | CH3   | 18.8                              | 1.90                           | s                  | 26       | CH3   | 13.2                              | 0.81                           | d (6.8)                  |
| 11       | CH    | 123.9                             | 5.76                           | d (10.7)           | 1'       | C=O   | 165                               | -                              | -                        |
| 12       | CH    | 133.1                             | 6.59                           | dd<br>(15.0, 10.8) | 2'       | CH    | 132.3                             | 6.72                           | d (15.8)                 |
| 13       | CH    | 125.5                             | 5.10                           | dd<br>(14.9, 9.0)  | 3'       | CH    | 135.6                             | 6.81                           | d (15.8)                 |
| 14       | CH    | 83.1                              | 4.00                           | dd<br>(9.1, 7.7)   | 4'       | C=O   | 167.5                             | -                              | -                        |
| 14-OCH3  | CH3   | 54.5                              | 3.25                           | s                  |          |       |                                   |                                |                          |

**Figure S1.** Atom numbering (A), chemical shift assignments (B), correlations (C), and J-values of JBIR-100 (D).

**A** atom numbering

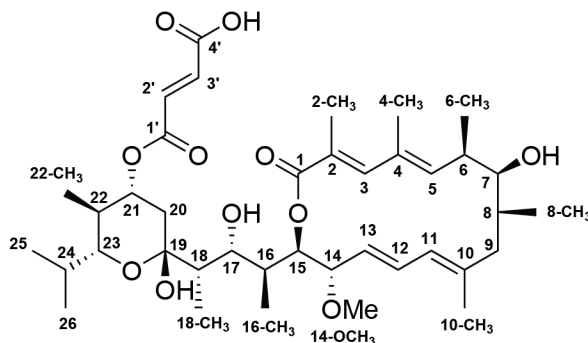

**B** chemical shift assignments

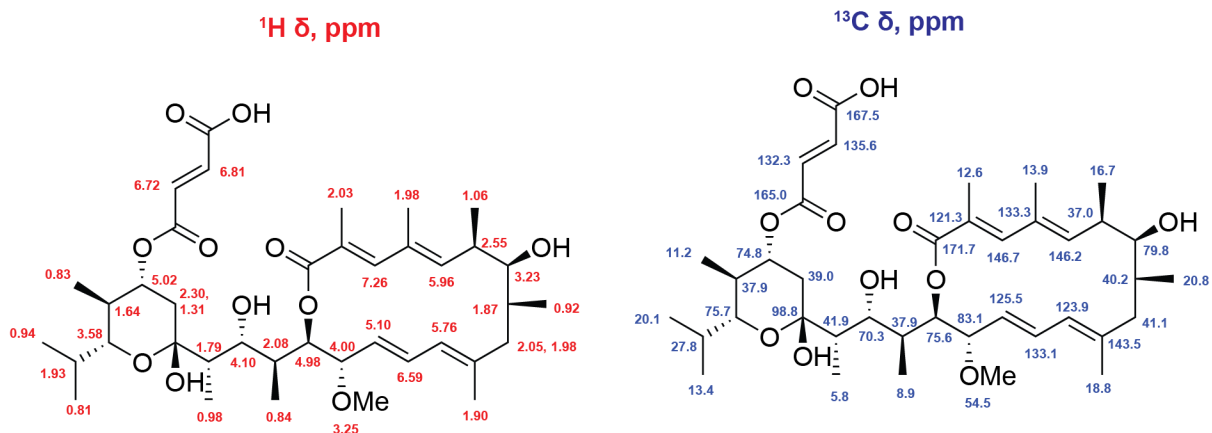

**C** correlations

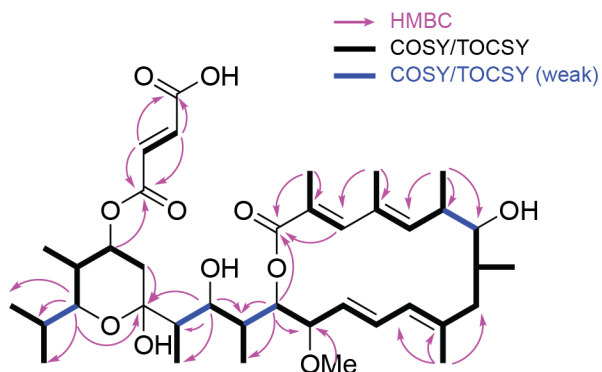

**D** J-values

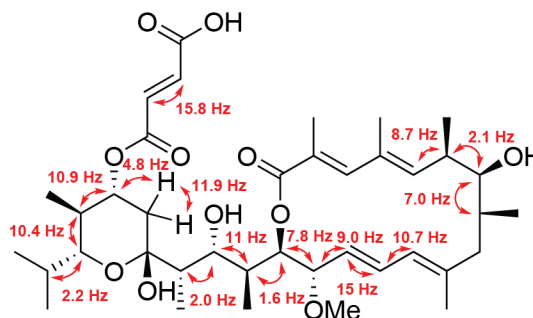

**Figure S2.**  $^1\text{H}$  NMR spectrum of JBIR-100 (750 MHz,  $\text{CD}_3\text{OD}$ ).

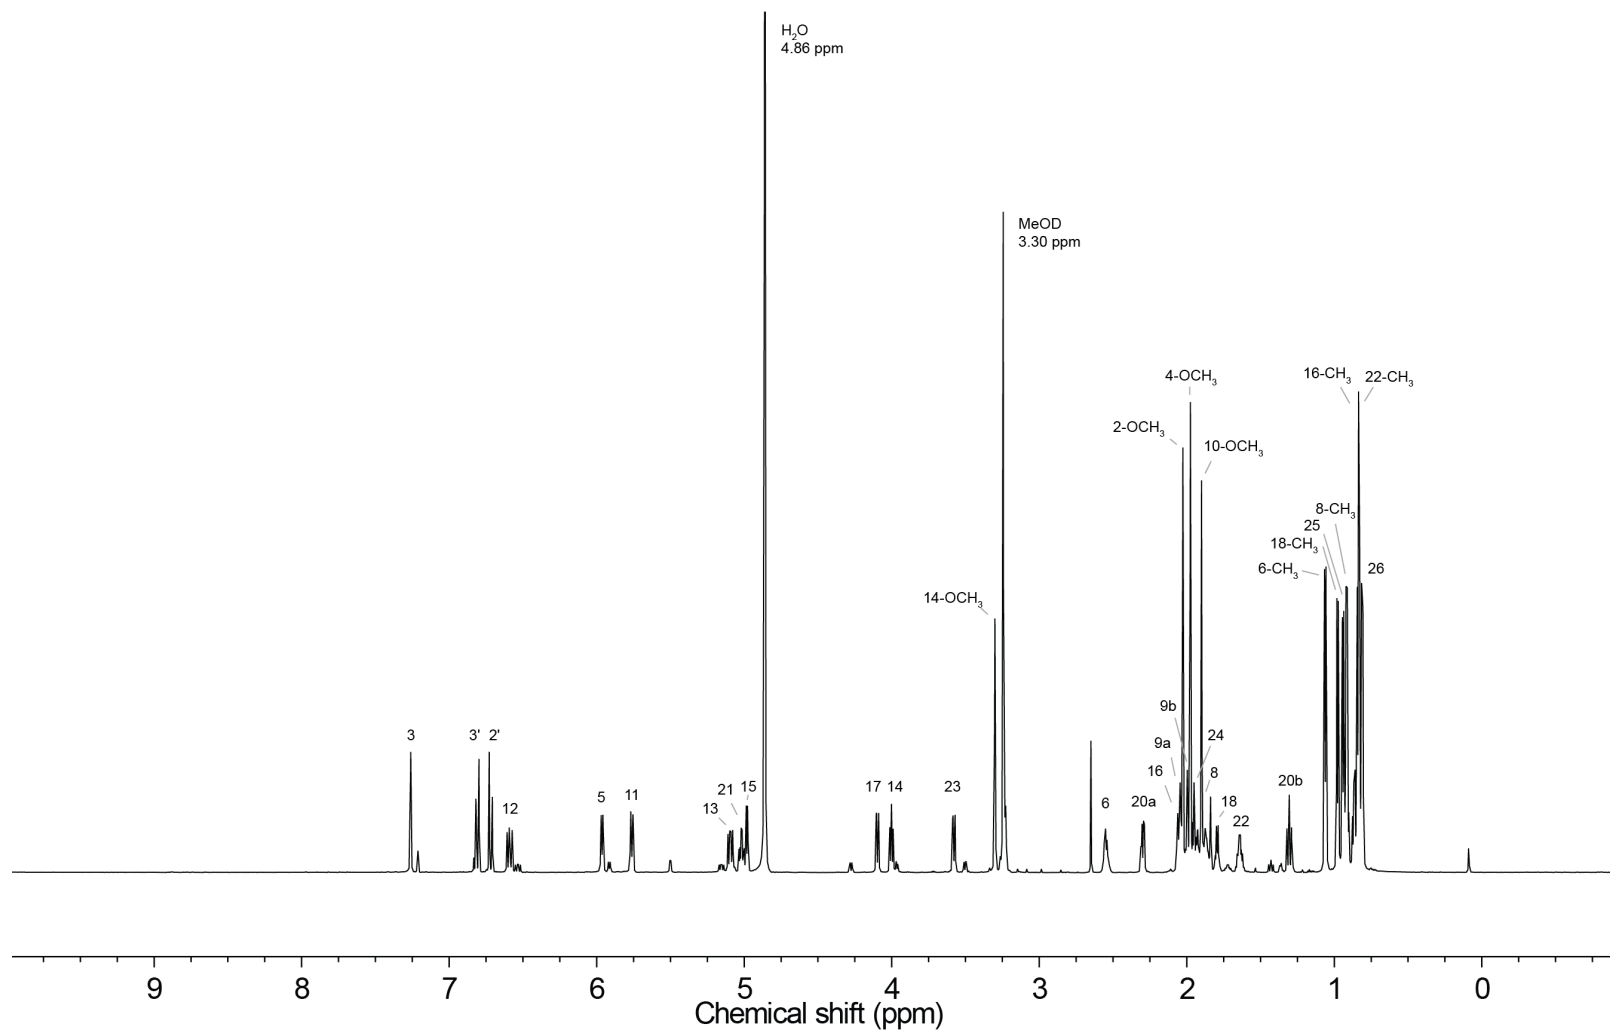

**Figure S3.**  $^1\text{H}$ - $^1\text{H}$  DQF-COSY spectrum of JBIR-100 (750 MHz,  $\text{CD}_3\text{OD}$ ).

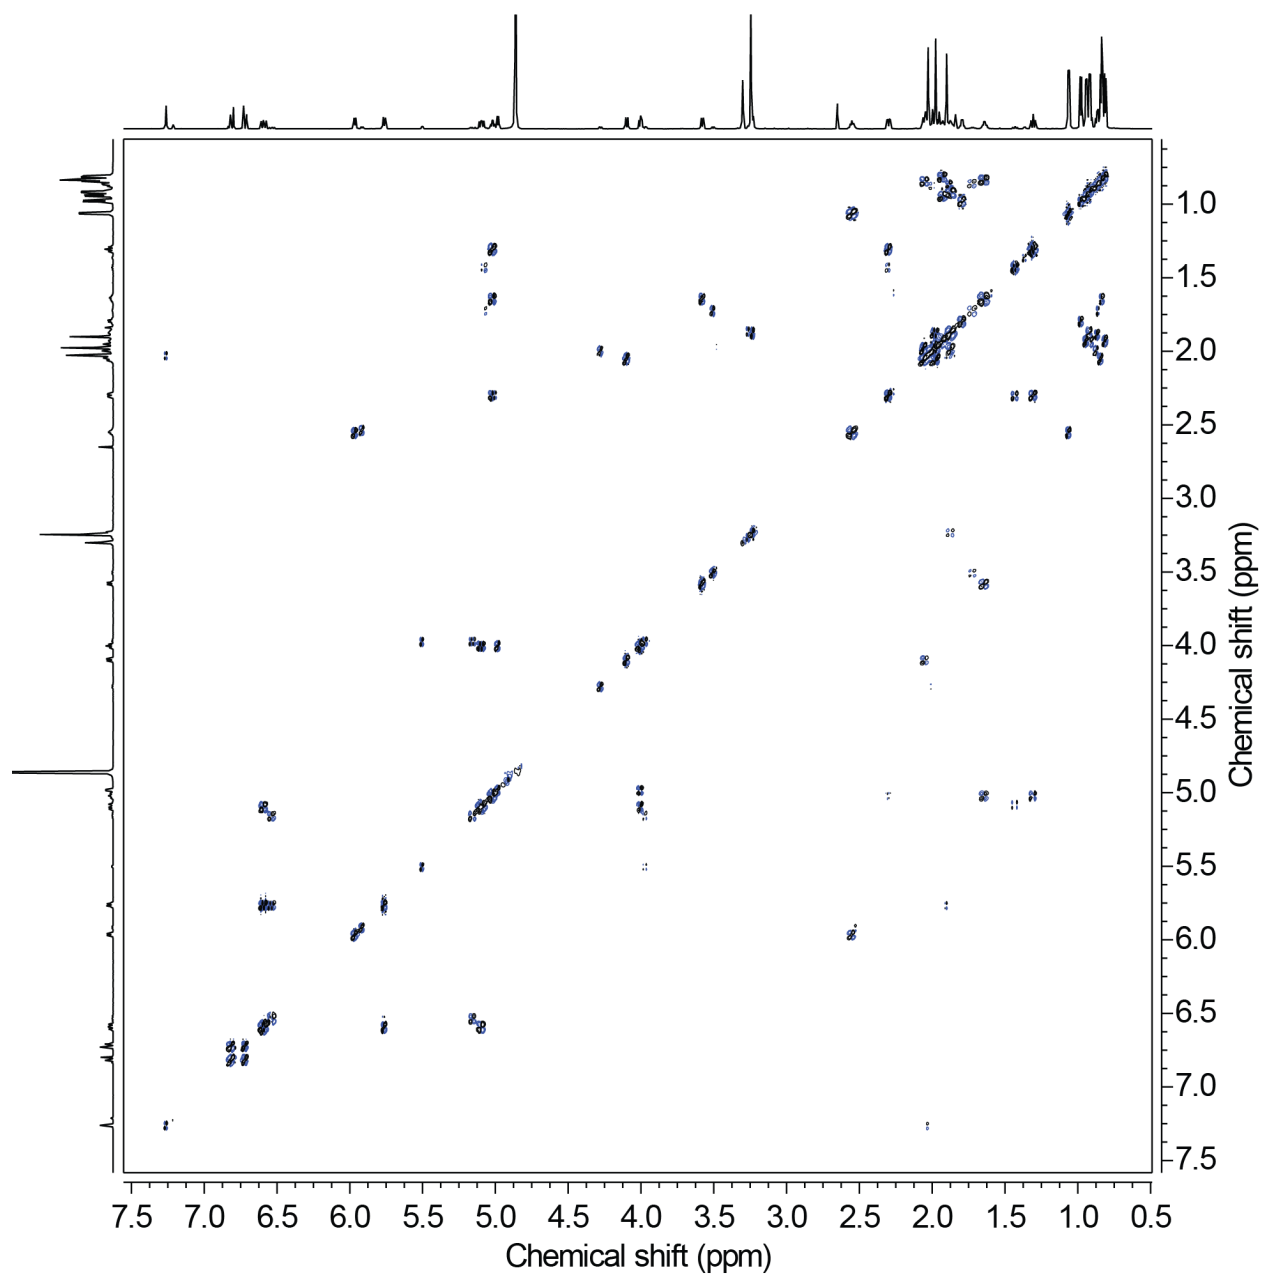

**Figure S4.**  $^1\text{H}$ - $^1\text{H}$  TOCSY spectrum of JBIR-100 (750 MHz,  $\text{CD}_3\text{OD}$ ).

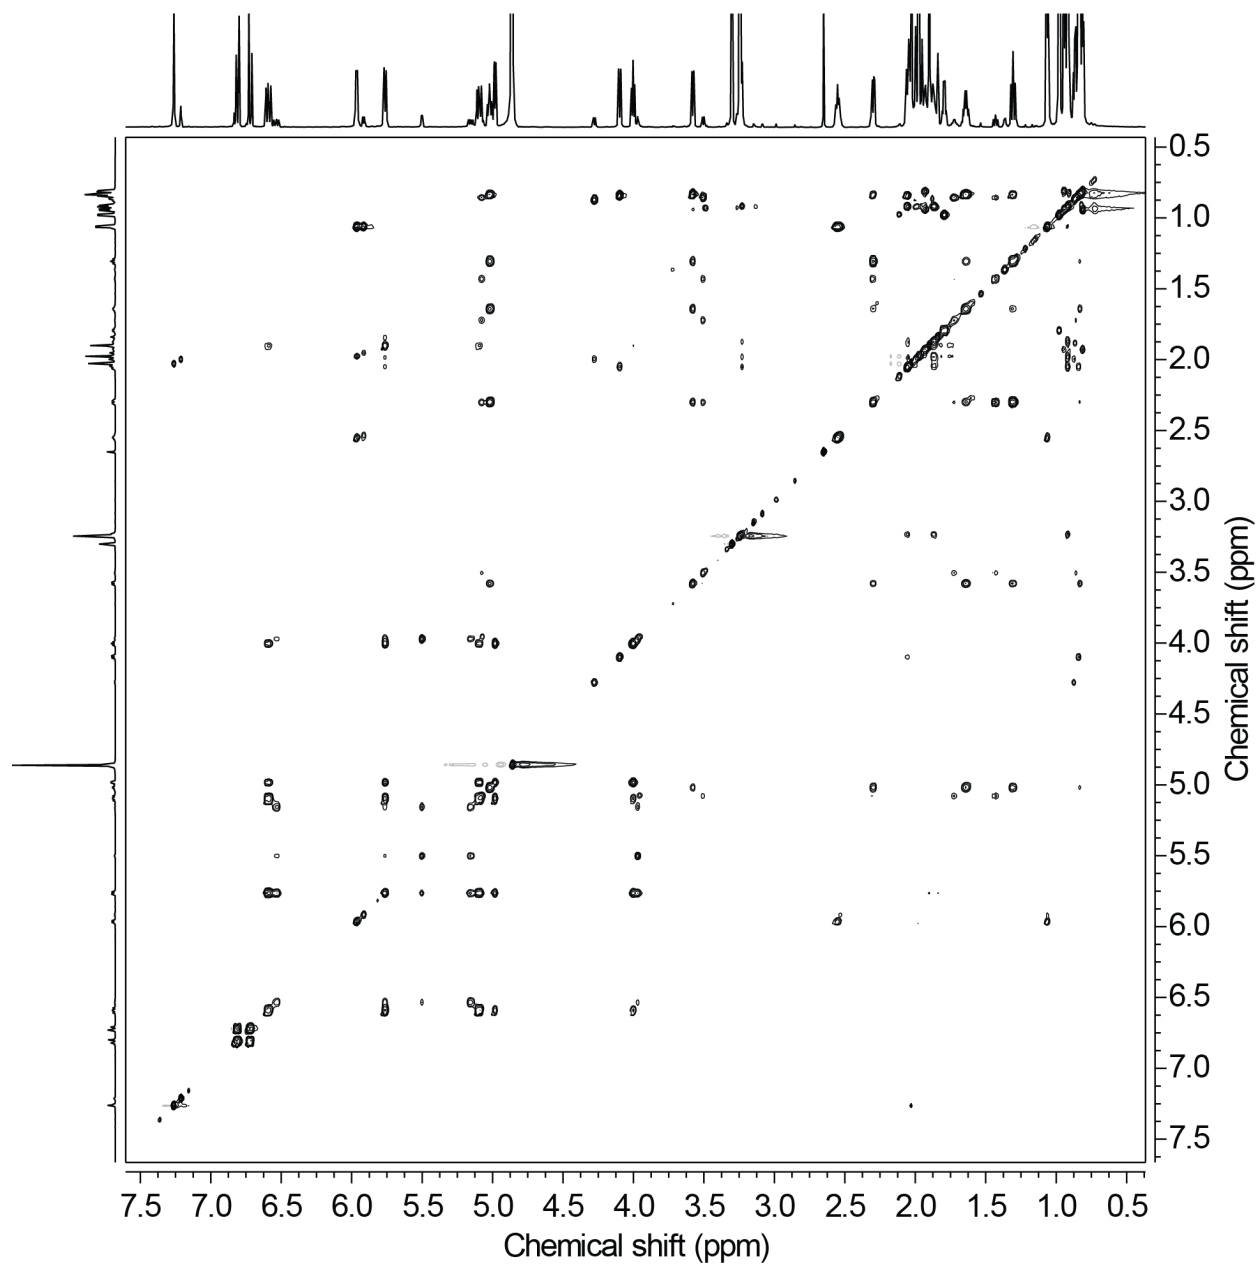

**Figure S5.**  $^1\text{H}$ - $^{13}\text{C}$  HSQC spectrum of JBIR-100 (750 MHz,  $\text{CD}_3\text{OD}$ ).

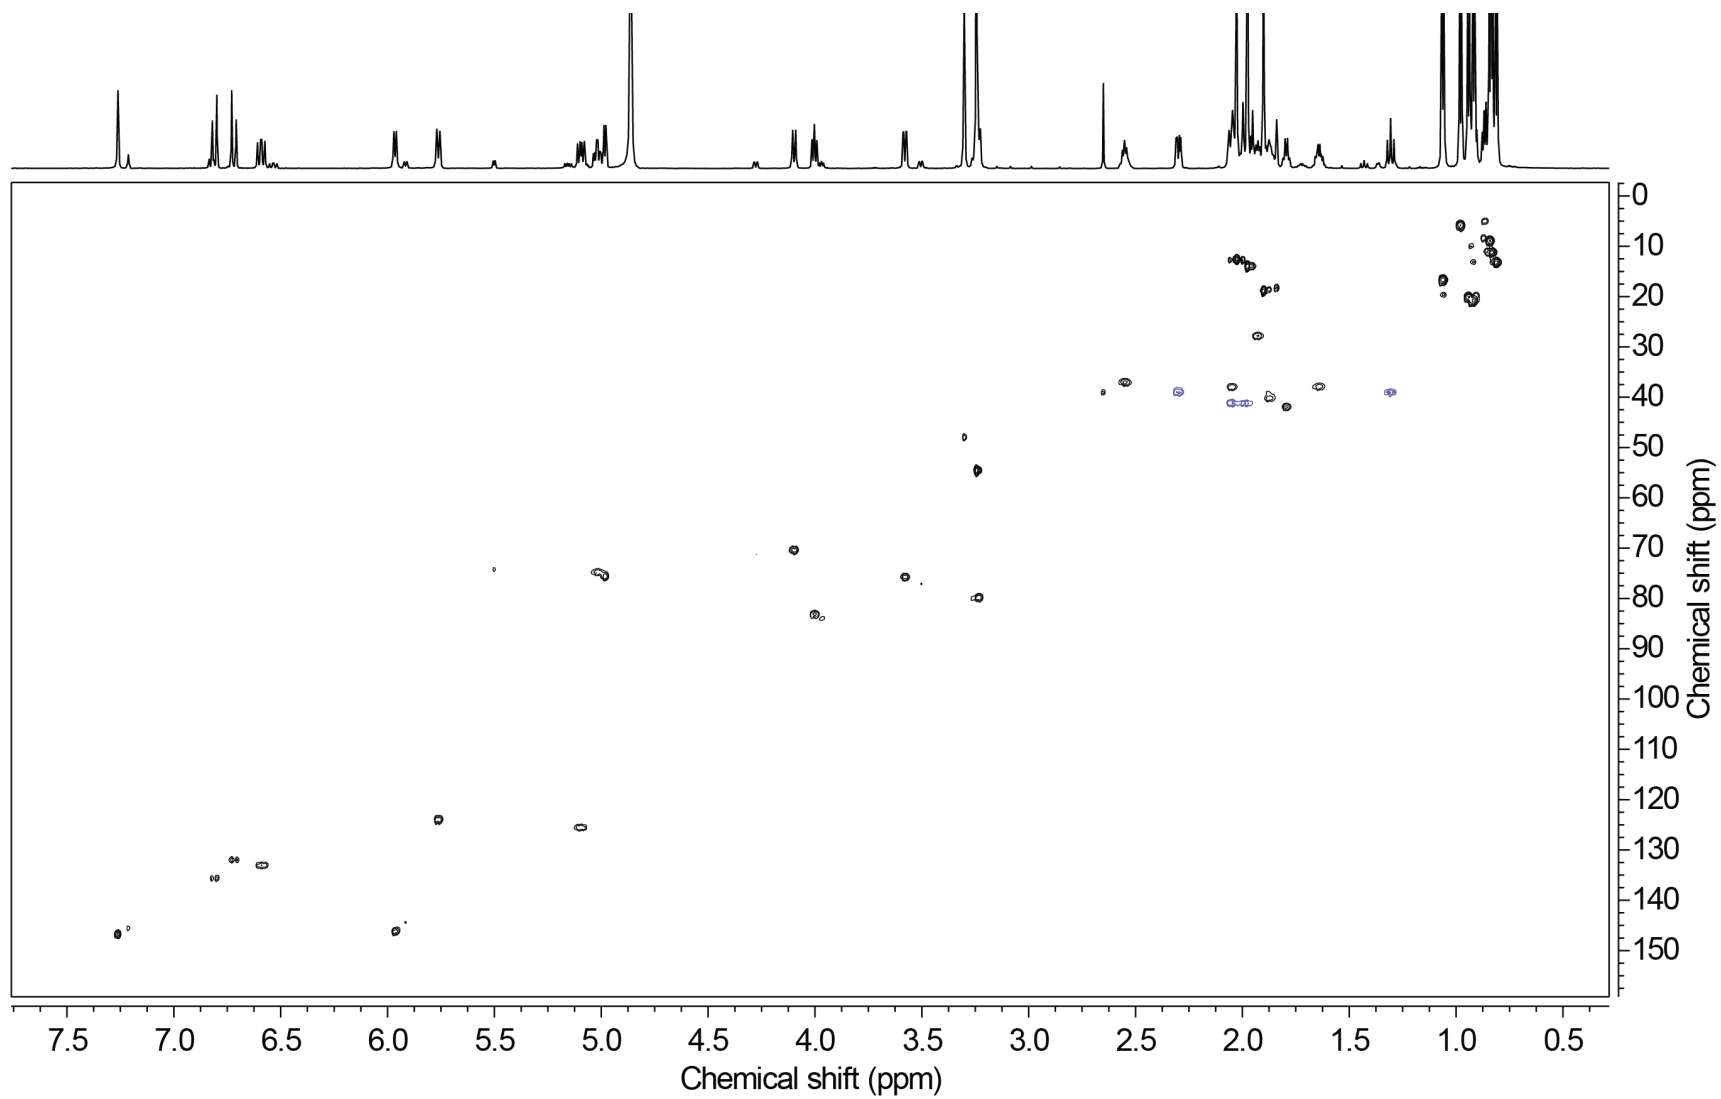

**Figure S6.**  $^1\text{H}$ - $^{13}\text{C}$  HMBC spectrum of JBIR-100 (750 MHz,  $\text{CD}_3\text{OD}$ )

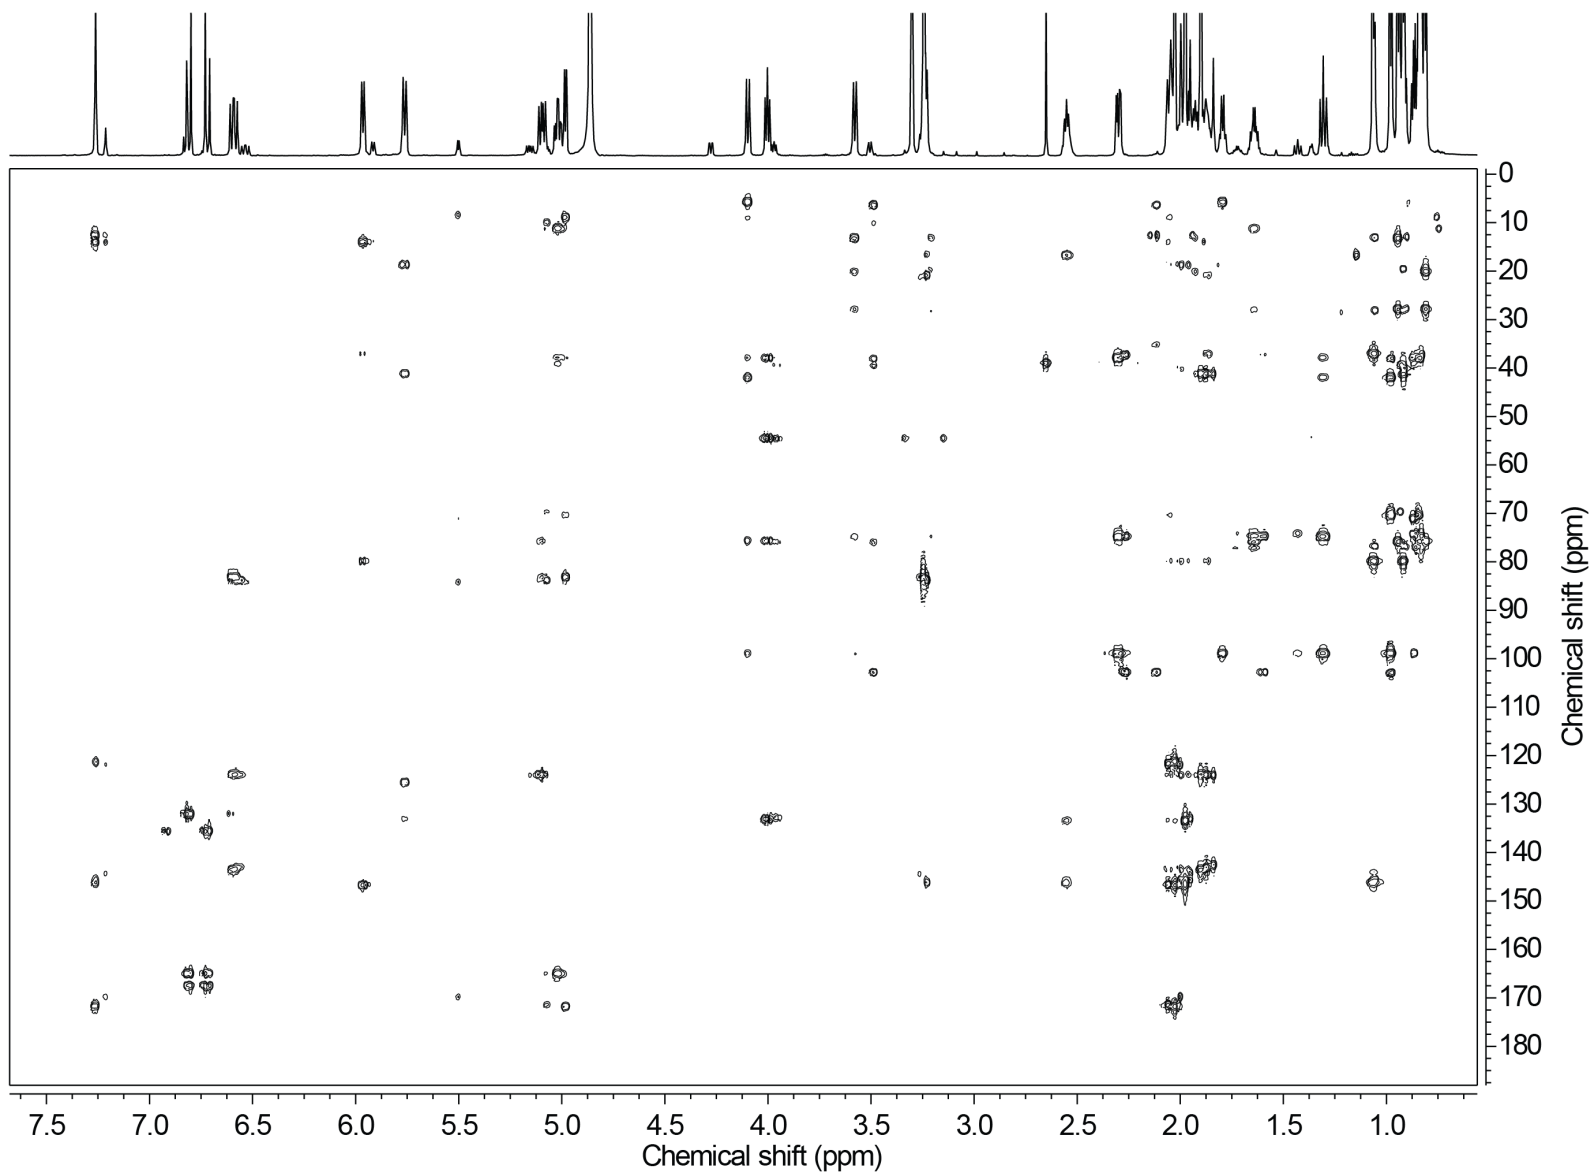



**Figure S7.** Growth defects of JBIR-100-resistant *B. subtilis* mutants. Growth rates (monitored at optical density at 595 nm) depicting the growth defects of JBIR-100-resistant mutants *B. subtilis* P10A, P10B and P10C compared to the parental strain, *B. subtilis* ATCC 47096. Data depicted is the average of two independent replicates.

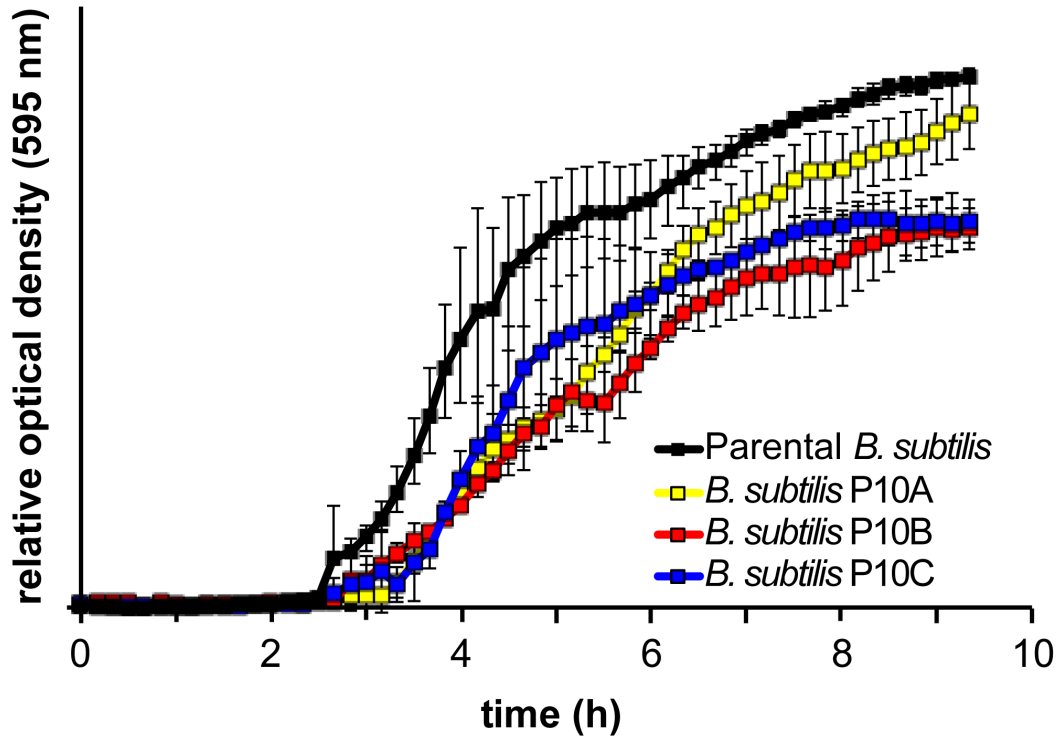

**Figure S8.** Representative plecomacrolide BGCs and their products. (A) Alignment of representative plecomacrolide BGCs. BGCs from *S. griseus*, *S. hygroscopicus*, *S. neyagawaensis*, and *S. lohii* were previously confirmed by genetic manipulation. BGCs from *S. halstedii*, *K. cheerisanensis*, *K. setae*, and *S. varsoviensis* were identified bioinformatically by homology to reported BGCs and biosynthetic logic. In *S. halstedii*, the BGCs are split between multiple partial-cluster contigs, as indicated. Interestingly, the methoxymalonate biosynthesis cassette is absent in the BGC from *S. hygroscopicus* despite the presence of this moiety in the molecule. *S. varsoviensis* lacks *bafXYZ* homologues thought to be responsible for 5-aminolevulinate installation; this structural moiety is not present in identified metabolites from this organism. (B) Representative natural products from the above BGCs are shown.

### A bafilomycin

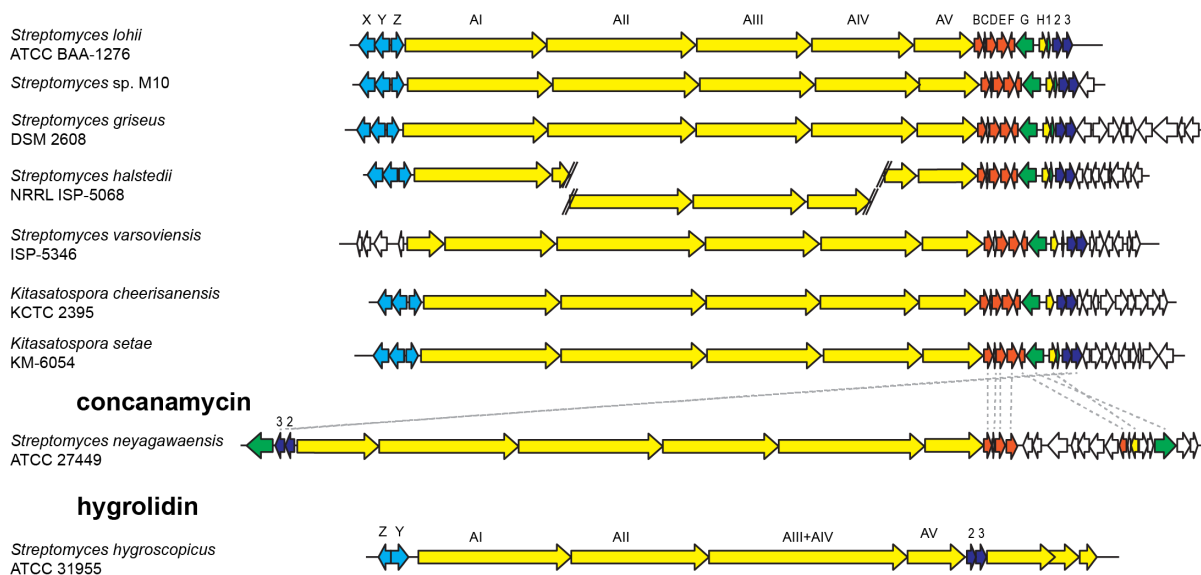

### B

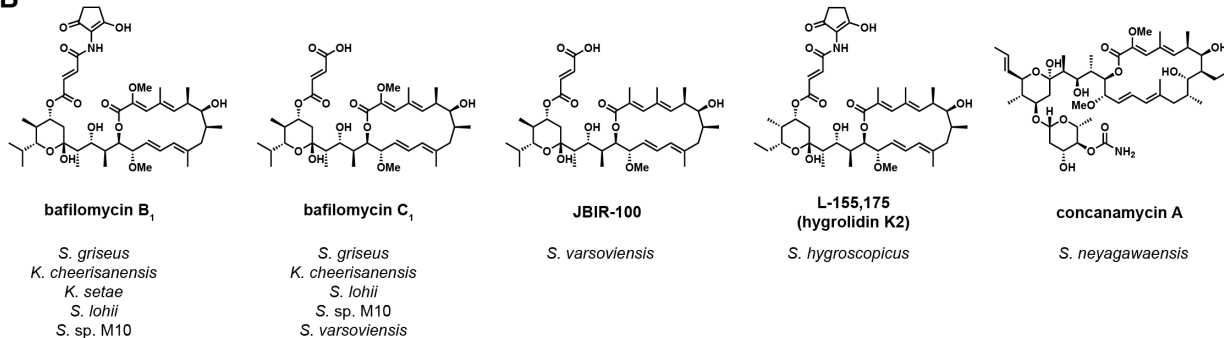

**Figure S9.** Stereospecificity prediction of KR domains. (A) Alignment of KR domains from the JBIR-100 BGC of *S. varsoviensis* NRRL ISP-5346. Sequence alignment was generated using MUSCLE (v. 3.8.31) on default settings and visualized using MView (v. 1.54). Key diagnostic residues are highlighted. (B) ScoreDiff values using prediction tool by Kitsche and Kalesse ([https://akitsche.shinyapps.io/profileHMM\\_App](https://akitsche.shinyapps.io/profileHMM_App)) for classification of KR domains.<sup>1</sup> Positive ScoreDiff values indicate predicted D stereochemistry, whereas negative ScoreDiff values predict L stereochemistry. ScoreDiff values with larger magnitudes indicate increased certainty. Methyl stereochemistry of KR2, KR4, and KR5 could not be confidently predicted. (C) Structure of JBIR-100 labeled with KRs responsible for setting stereocenters.

**A**

```

1 [ . . . . . : . . . . . 80
1 KR-9 100.0% TVLLTGGTGAVGPHLARWLARGGAEHVLPGRRPDAPGATELAAELAESGTRLSLPRCDLTDRGAVEEMLARLDAQGDP
2 KR-4 49.5% TTLITGGTGGIGAQIARWLARRGAEHLVLSRGGPDAPGAAELSEELTGLGARTTLASCDVADLAALRSLKEGLERDGC
3 KR-2 53.0% TVLITGGTGGGLGAHVARKLAAEGAEHLVLLSRRGPRSPGAAELTAELSALGARSTVLACDVADRAALTRVLDGLRAEQET
4 KR-1 40.3% TVLVTGGTGGVGACTARRLAEQVERLLLVSRRGPDAPGAGELCAELAELGVEASVVACDIADREALAALVAGIP-DEAP
5 KR-5 46.4% TTLITGGTRGLGAQVARHLARAGAEHLLLSRRGAGTPGADALLAELEQLGADVTVAACDVADRDALAELLAAVP-AGRP

81 . . . . . : . . . . . 160
1 KR-9 100.0% VTAVVHAAAFIALAPLESTPLSAFERIVAAKAAGAAHLDALLDRE-----LDAFVLFSSIAGVWGS
2 KR-4 49.5% IRTVLHAAAGGSLVPLPDTDLAEFAETLYAKVGGARNLDDLFDGDDGDGDGAGEGAGEGGGGPLDAFVLFSSISGVWGS
3 KR-2 53.0% VRVAVHTAGLTSDTRIEHCTPDGVARETAAKTRGADHLDALEFDSPS-----LDAFVLFSSISATWGS
4 KR-1 40.3% LTGVFHAAGVLDLGLLDALTPARLAVSLRAKLTAAQNLHEVTAGLD-----LSAFVVFSSVMGVVGN
5 KR-5 46.4% LRAVVHAAGVLDLGVIDSITPERAAGVLRPKLDAARHLVDLTRDRD-----LTAFVLFSSLAGTLGG

161 . . . . . 2 . . . . . ] 214
1 KR-9 100.0% GDHGAYAAGNAYLGALAQHRRRARGLRATTVDWGVWQA-----
2 KR-4 49.5% AIHGAYAAANAYLDGLAERRRARGRAATSVVWGIWS-----
3 KR-2 53.0% GGOAAYAAANAHLDALAAARCARGLAATSVAVGPWS-----GA-----
4 KR-1 40.3% AGQGNYYAANAAMDALVALRRADGLPGTSLAWGAWAVTGMLDGEVAARLRDAGM
5 KR-5 46.4% TGQGSYAAANAYLDALAQRRDRGLPGTSLAVWGLWA-----GD-----

```

**Key:**

Type A (L-alcohol) x

L-methyl x

D-methyl x

Type B (D-alcohol) x

**B**

| Ketoreductase domain         | Prediction | ScoreDiff |
|------------------------------|------------|-----------|
| Domain 1 ketoreductase (KR1) | D-alcohol  | 29.6      |
| Domain 2 ketoreductase (KR2) | L-alcohol  | -25.6     |
| Domain 4 ketoreductase (KR4) | L-alcohol  | -77.09    |
| Domain 5 ketoreductase (KR5) | D-alcohol  | 35.3      |
| Domain 9 ketoreductase (KR9) | L-alcohol  | -80.46    |
|                              | L-methyl   | -74.95    |

**C**

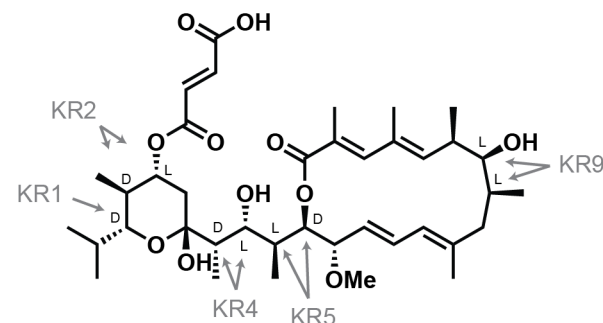

**Table S2.** Accession numbers for hygrolide BGCs. Nearest homologues of compounds from the *baf* BGC in *S. lohii* are shown. In some cases, locus tags or nucleotide coordinates are given in lieu of accessions for nucleotide-only records. The *bafAIV* homologue in *S. halstedii* is split between two contigs and so its percent identity was not assessed. In *S. hygrosopicus*, the protein corresponding to CCF2302 is a fusion of BafAIII and BafAIV.

| Gene           | <i>S. lohii</i> |             |                      | <i>S. varsoviensis</i> |             |                           | S. sp. M10 |             |              | <i>S. griseus</i> |             |              | <i>K. setae</i> |             |              | <i>K. cheerisanensis</i> |             |              | <i>S. halstedii</i>    |             |              | <i>S. hygrosopicus</i> |             |              | <i>S. neyagawaensis</i> |             |              |    |
|----------------|-----------------|-------------|----------------------|------------------------|-------------|---------------------------|------------|-------------|--------------|-------------------|-------------|--------------|-----------------|-------------|--------------|--------------------------|-------------|--------------|------------------------|-------------|--------------|------------------------|-------------|--------------|-------------------------|-------------|--------------|----|
|                | Accession       | Length (aa) |                      | Accession              | Length (aa) | Identity (%)              | Accession  | Length (aa) | Identity (%) | Accession         | Length (aa) | Identity (%) | Accession       | Length (aa) | Identity (%) | Accession                | Length (aa) | Identity (%) | Accession              | Length (aa) | Identity (%) | Accession              | Length (aa) | Identity (%) | Accession               | Length (aa) | Identity (%) |    |
| <i>bafX</i>    | ADC79613        | 528         | -                    | -                      | -           | -                         | AIY53018   | 530         | 94           | AGK25217          | 461         | 94           | BAJ33096        | 538         | 88           | KDN87768                 | 518         | 89           | WP_030630771           | 531         | 93           | -                      | -           | -            | -                       | -           | -            |    |
| <i>bafY</i>    | ADC79614        | 514         | -                    | -                      | -           | -                         | AIY53019   | 514         | 95           | AGK25192          | 514         | 96           | BAJ33097        | 517         | 87           | KDN87767                 | 514         | 89           | WP_030630774           | 514         | 93           | CCF23199               | 640         | 56           | -                       | -           | -            |    |
| <i>bafZ</i>    | ADC79615        | 414         | -                    | -                      | -           | -                         | AIY53020   | 414         | 98           | AGK25193          | 414         | 98           | BAJ33098        | 410         | 88           | KDN87766                 | 410         | 89           | WP_030630777           | 414         | 93           | CCF23198               | 426         | 71           | -                       | -           | -            |    |
| <i>bafAI</i>   | ADC79616        | 4884        | IF55_RS32365 (locus) | 5174                   | 68          | -                         | AIY53021   | 5007        | 93           | AGK25194          | 5015        | 93           | BAJ33099        | 4833        | 82           | KDN87765                 | 4759        | 84           | WP_030817189           | 4807        | 89           | CCF23200               | 5282        | 55           | AAZ94387                | 4825        | 61           |    |
| <i>bafAII</i>  | ADC79617        | 5145        | WP_048832936         | 5105                   | 69          | -                         | AIY53022   | 5064        | 95           | AGK25213          | 5088        | 94           | BAJ33100        | 5004        | 86           | KDN87764                 | 4988        | 86           | WP_030818068 (partial) | 4268        | 89           | CCF23201               | 4763        | 62           | AAZ94388                | 4970        | 68           |    |
| <i>bafAIII</i> | ADC79618        | 3968        | IF55_RS32375 (locus) | 3935                   | 67          | -                         | AIY53023   | 3980        | 94           | AGK25214          | 3980        | 94           | BAJ33101        | 3964        | 85           | KDN87763                 | 3915        | 87           | IG73_RS35125 (locus)   | 3880        | 90           | CCF23202               | 6871        | 58           | AAZ94389                | 3982        | 65           |    |
| <i>bafAIV</i>  | ADC79619        | 3511        | WP_037966908         | 3473                   | 68          | -                         | AIY53024   | 3614        | 90           | AGK25195          | 3626        | 89           | BAJ33102        | 3436        | 85           | KDN87762                 | 3392        | 85           | partial                | ND          | ND           | -                      | -           | -            | 55                      | AAZ94390    | 5006         | 62 |
| <i>bafAV</i>   | ADC79620        | 2103        | IF55_RS32385 (locus) | 2098                   | 62          | KM245330.1 [58129..64485] | ND         | ND          | AGK25196     | 2105              | 93          | BAJ33103     | 2110            | 83          | KDN87761     | 2097                     | 85          | WP_030631833 | 2123                   | 90          | CCF23203     | 1983                   | 52          | AAZ94391     | 2056                    | 61          |              |    |
| <i>bafB</i>    | ADC79621        | 296         | WP_048832937         | 294                    | 78          | -                         | AIY53025   | 296         | 97           | AGK25191          | 296         | 97           | BAJ33104        | 301         | 88           | KDN87760                 | 289         | 91           | WP_028443380           | 289         | 91           | -                      | -           | -            | AAZ94392                | 290         | 70           |    |
| <i>bafC</i>    | ADC79622        | 93          | WP_048832938         | 100                    | 73          | -                         | AIY53026   | 93          | 97           | AGK25197          | 93          | 97           | BAJ33105        | 93          | 86           | KDN87759                 | 89          | 88           | WP_028443381           | 93          | 94           | -                      | -           | -            | AAZ94393                | 92          | 72           |    |
| <i>bafD</i>    | ADC79623        | 363         | IF55_RS32400 (locus) | 385                    | 73          | -                         | AIY53027   | 363         | 98           | AGK25198          | 363         | 98           | BAJ33106        | 371         | 90           | KDN87758                 | 371         | 90           | WP_030631836           | 371         | 94           | -                      | -           | -            | AAZ94394                | 371         | 73           |    |
| <i>bafE</i>    | ADC79624        | 365         | WP_048832952         | 374                    | 80          | -                         | AIY53028   | 366         | 98           | AGK25199          | 366         | 97           | BAJ33107        | 383         | 88           | KDN87757                 | 366         | 93           | WP_030631838           | 366         | 93           | -                      | -           | -            | AAZ94395                | 380         | 72           |    |
| <i>bafF</i>    | ADC79625        | 220         | WP_030890472         | 220                    | 77          | -                         | AIY53029   | 220         | 96           | AGK25200          | 220         | 96           | BAJ33108        | 220         | 91           | KDN87756                 | 220         | 92           | WP_028443384           | 220         | 94           | -                      | -           | -            | AAZ94403                | 222         | 69           |    |
| <i>bafG</i>    | ADC79626        | 609         | WP_030890475         | 637                    | 67          | -                         | AIY53030   | 609         | 95           | AGK25201          | 609         | 95           | BAJ33109        | 622         | 84           | KDN87755                 | 639         | 84           | WP_030631840           | 627         | 91           | -                      | -           | -            | AAZ94408                | 701         | 53           |    |
| <i>bafH</i>    | ADC79627        | 253         | WP_030890478         | 249                    | 67          | -                         | AIY53031   | 253         | 96           | AGK25202          | 253         | 96           | BAJ33110        | 253         | 82           | KDN87754                 | 213         | 83           | WP_028443386           | 253         | 92           | -                      | -           | -            | AAZ94405                | 270         | 48           |    |
| <i>orf1</i>    | ADC79628        | 117         | WP_037966912         | 72                     | 72          | -                         | AIY53032   | 117         | 92           | AGK25203          | 117         | 92           | BAJ33111        | 105         | 74           | -                        | -           | -            | WP_028443387           | 122         | 88           | -                      | -           | -            | -                       | -           | -            |    |
| <i>orf2</i>    | ADC79629        | 320         | WP_030890486         | 319                    | 79          | -                         | AIY53033   | 348         | 97           | AGK25204          | 348         | 97           | BAJ33112        | 320         | 88           | KDN87753                 | 320         | 90           | WP_030631842           | 320         | 92           | CCF23204               | 324         | 57           | AAZ94385                | 320         | 68           |    |
| <i>orf3</i>    | ADC79630        | 332         | WP_048832939         | 366                    | 82          | -                         | AIY53034   | 359         | 97           | AGK25205          | 359         | 97           | BAJ33113        | 363         | 89           | KDN87752                 | 359         | 90           | WP_028443389           | 359         | 94           | CCF23205               | 362         | 67           | AAZ94384                | 368         | 74           |    |

**Figure S10.** Phylogenetic tree of homologues from hygrolide/concanamycin BGCs. Shown are maximum-likelihood trees for (A) ORF3 homologues and (B) BafD homologues. The structural class of compound predicted or known to correspond to an organism is indicated. For organisms listed in black, a compound class could not be predicted and novelty is suspected. The actinomycete *Frankia alni* was chosen as an outgroup and is not predicted to contain a hygrolide BGC.

**A ORF3 homologues**

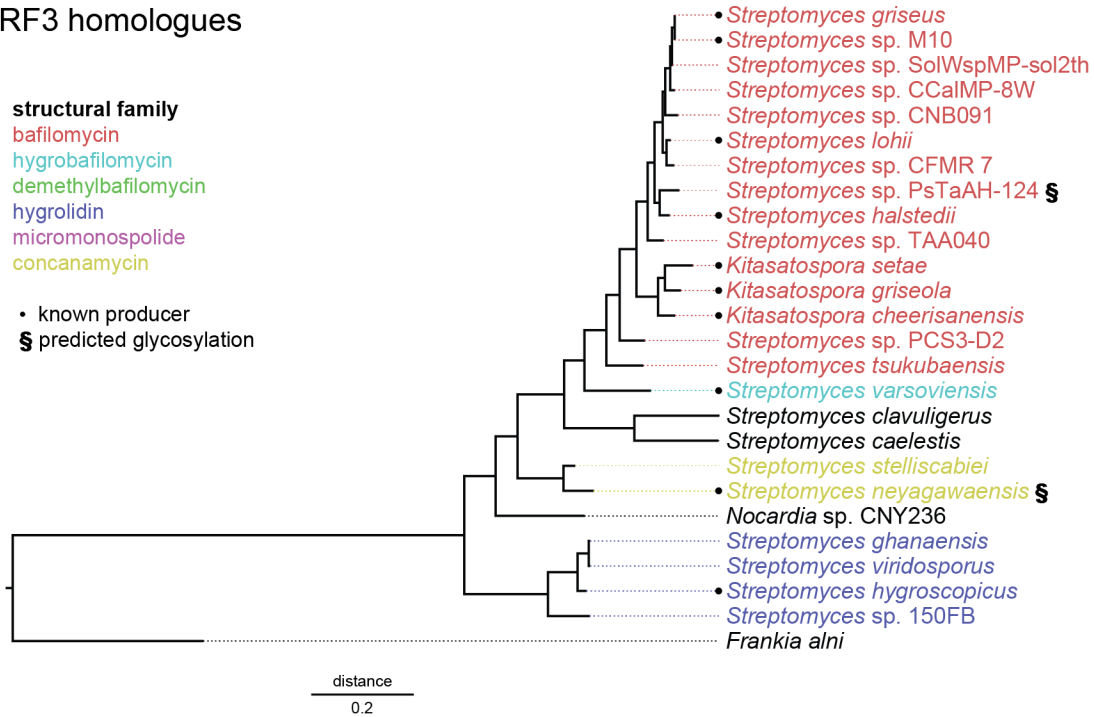

**B BafD homologues**

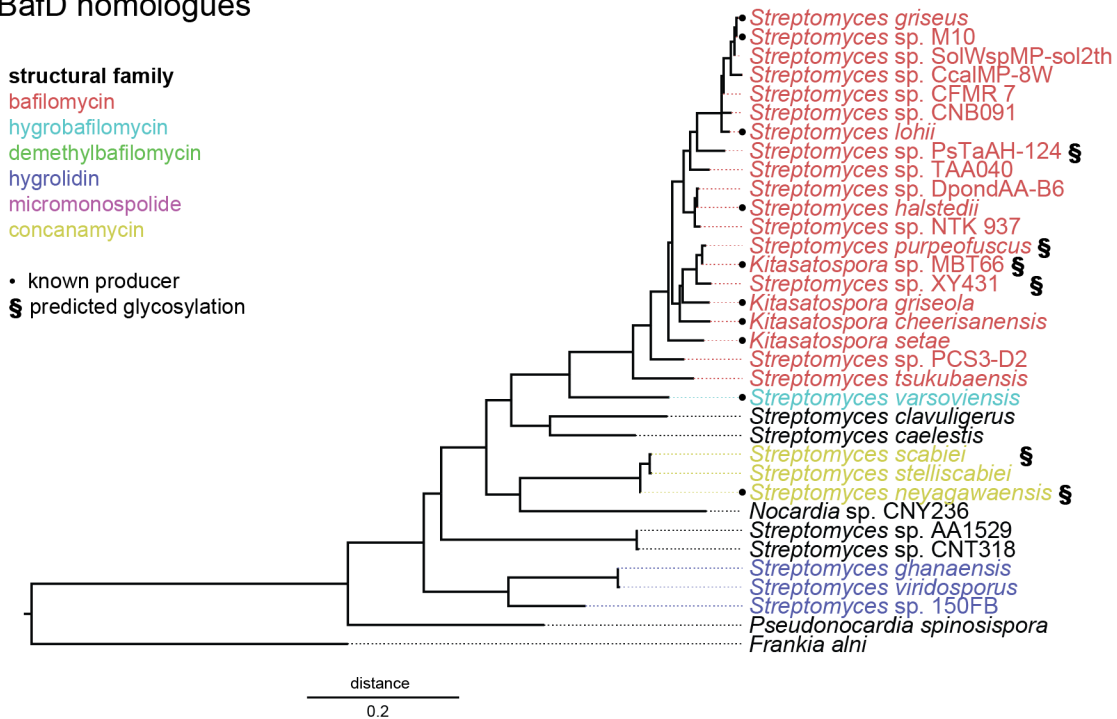

**Figure S11.** Phylogenetic tree of hygrolide producers. (A) A maximum-likelihood phylogenetic tree was generated using 16S rRNA gene sequences of known producing organisms for various hygrolides. For the genus *Micromonospora*, no 16S sequence corresponding to a confirmed producer was available, so *M. inyonensis* and *M. peucetia* were used as placeholders. For organisms listed in black, a compound class could not be predicted and novelty is suspected. The actinomycete *Frankia alni* was chosen as an outgroup and is not predicted to contain a hygrolide BGC. (B) Core scaffolds of the families shown in (A) are given. Within each family, variation is seen at various positions of the core. Features distinguishing the families from each other are shown in red.

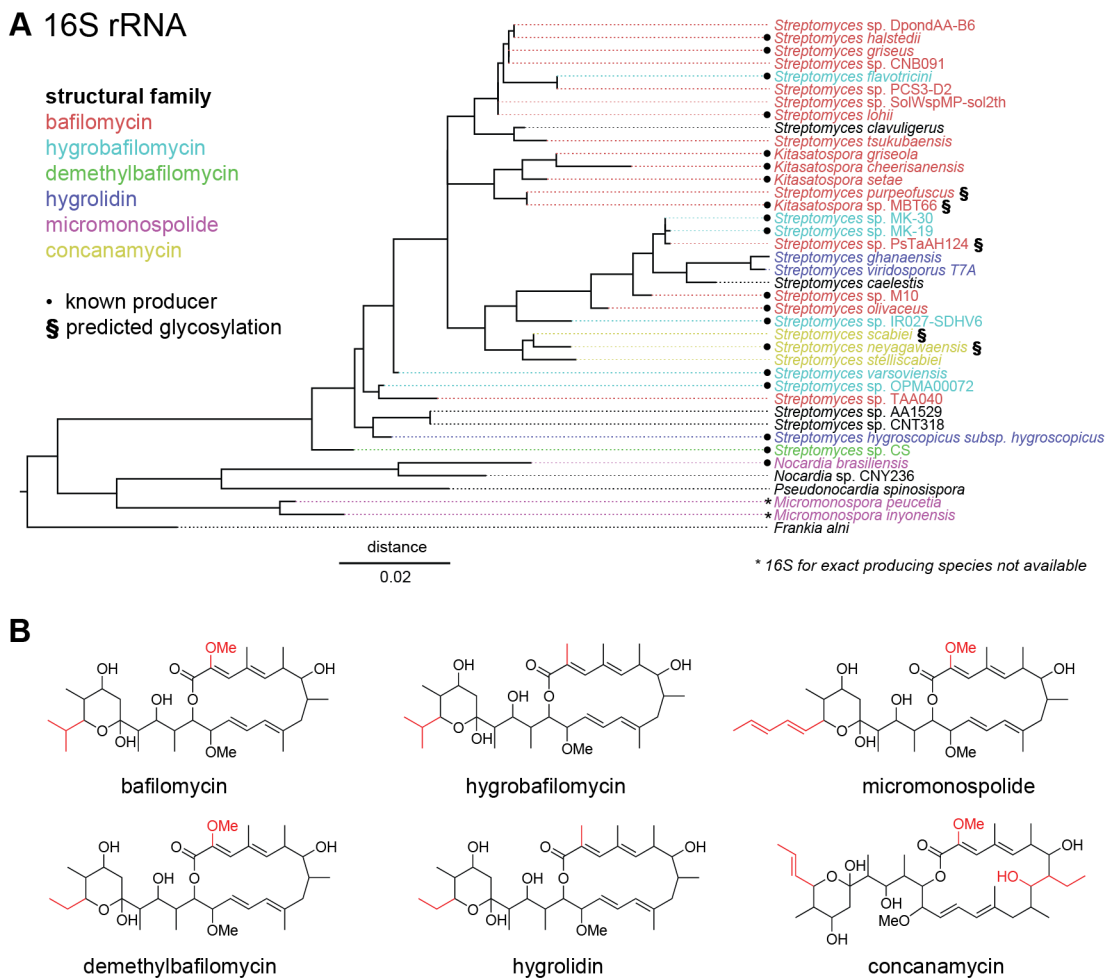

**Table S3.** Phylogenetic classification of known and predicted hygrolide BGCs. BafD and ORF3 homologues are given from each organism as GI numbers. The percent amino acid identity of each gene to a set of representative genes from organisms harboring bafilomycin, hygrobafilomycin, hygrolidin, or concanamycin BGCs was found using BLAST and is indicated by the depth of color shade. BGCs were classified by similarity. BGCs where a hygrolide compound has been isolated are indicated, along with the structural family of compounds. For several BGCs (bottom of the table), a definitive assignment could not be made due to a lack of strong relatedness to any of the model sequences. n.d., not determinable. Twenty-two BGCs have no known associated natural product(s). For BafD, where no homologue exists in the *S. hygrosopicus* BGC, the homologue from *S. ghanaensis* was used instead for comparison.

| Homologue (GI number) |           | Organism                                | Identity (% aa) to ORF3 |                 |                          |                        |                         | Identity (% aa) to BafD |                 |                          |                      |                         | Scaffold Prediction | Known Natural Product Structural Family |
|-----------------------|-----------|-----------------------------------------|-------------------------|-----------------|--------------------------|------------------------|-------------------------|-------------------------|-----------------|--------------------------|----------------------|-------------------------|---------------------|-----------------------------------------|
| BafD                  | ORF3      |                                         | <i>S. lohii</i>         | <i>K. setae</i> | <i>S. varsovoviensis</i> | <i>S. hygrosopicus</i> | <i>S. neyagawaensis</i> | <i>S. lohii</i>         | <i>K. setae</i> | <i>S. varsovoviensis</i> | <i>S. ghanaensis</i> | <i>S. neyagawaensis</i> |                     |                                         |
| 288965957             | 288965964 | <i>Streptomyces lohii</i>               | 100                     | 89              | 82                       | 67                     | 74                      | 100                     | 90              | 75                       | 69                   | 73                      | bafilomycin         | bafilomycin                             |
| 482661949             | 482661956 | <i>Streptomyces griseus</i>             | 97                      | 88              | 80                       | 67                     | 74                      | 98                      | 90              | 76                       | 69                   | 73                      | bafilomycin         | bafilomycin                             |
| 493388797             | 493388790 | <i>Streptomyces tsukubaensis</i>        | 88                      | 86              | 83                       | 68                     | 75                      | 85                      | 86              | 74                       | 68                   | 72                      | bafilomycin         | -                                       |
| 517298471             | 517298478 | <i>Streptomyces</i> sp. CcallMP-8W      | 97                      | 89              | 80                       | 66                     | 74                      | 97                      | 90              | 73                       | 68                   | 72                      | bafilomycin         | -                                       |
| 517394815             | 517394807 | <i>Streptomyces</i> sp. PsTaAH-124      | 93                      | 88              | 81                       | 66                     | 74                      | 92                      | 91              | 74                       | 68                   | 71                      | bafilomycin         | -                                       |
| 517791715             | 517791722 | <i>Streptomyces</i> sp. CNB091          | 96                      | 88              | 79                       | 66                     | 74                      | 98                      | 90              | 73                       | 67                   | 72                      | bafilomycin         | -                                       |
| 654969407             | 654969414 | <i>Streptomyces</i> sp. SolWspMP-sol2th | 97                      | 89              | 80                       | 67                     | 74                      | 98                      | 90              | 73                       | 68                   | 72                      | bafilomycin         | -                                       |
| 654979441             | 654979377 | <i>Streptomyces</i> sp. TAA040          | 94                      | 88              | 80                       | 66                     | 74                      | 93                      | 91              | 74                       | 68                   | 72                      | bafilomycin         | -                                       |
| 654993951             | n.a.      | <i>Streptomyces</i> sp. DpondAA-B6      | -                       | -               | -                        | -                      | -                       | 94                      | 92              | 74                       | 70                   | 71                      | bafilomycin         | -                                       |
| 663401407             | n.a.      | <i>Streptomyces purpeofuscus</i>        | -                       | -               | -                        | -                      | -                       | 91                      | 92              | 74                       | 71                   | 74                      | bafilomycin         | -                                       |
| 664093809             | 654993958 | <i>Streptomyces halstedii</i>           | 94                      | 90              | 82                       | 67                     | 75                      | 94                      | 93              | 74                       | 70                   | 72                      | bafilomycin         | bafilomycin                             |
| 726969199             | 726969206 | <i>Streptomyces</i> sp. M10             | 97                      | 88              | 80                       | 67                     | 74                      | 98                      | 90              | 76                       | 69                   | 73                      | bafilomycin         | bafilomycin                             |
| 737891878             | 737891867 | <i>Kitasatospora cheerisanensis</i>     | 90                      | 93              | 80                       | 68                     | 73                      | 90                      | 92              | 74                       | 71                   | 74                      | bafilomycin         | bafilomycin                             |
| 740031905             | 654993958 | <i>Streptomyces</i> sp. NTK 937         | 94                      | 90              | 82                       | 67                     | 75                      | 93                      | 93              | 74                       | 70                   | 72                      | bafilomycin         | -                                       |
| 740068110             | 740068128 | <i>Streptomyces</i> sp. PCS3-D2         | 89                      | 86              | 84                       | 67                     | 76                      | 88                      | 90              | 75                       | 71                   | 73                      | bafilomycin         | -                                       |
| 759764416             | n.a.      | <i>Kitasatospora</i> sp. MBT66          | -                       | -               | -                        | -                      | -                       | 91                      | 92              | 74                       | 71                   | 74                      | bafilomycin         | bafilomycin                             |
| 763023462             | 763023454 | <i>Kitasatospora griseola</i>           | 90                      | 92              | 79                       | 67                     | 72                      | 91                      | 93              | 74                       | 70                   | 73                      | bafilomycin         | bafilomycin                             |
| 799307788             | n.a.      | <i>Streptomyces</i> sp. XY431           | -                       | -               | -                        | -                      | -                       | 91                      | 91              | 74                       | 71                   | 74                      | bafilomycin         | -                                       |
| 916321000             | 503906410 | <i>Kitasatospora setae</i>              | 89                      | 100             | 79                       | 67                     | 73                      | 90                      | 100             | 75                       | 69                   | 73                      | bafilomycin         | bafilomycin                             |
| 924906653             | 924906647 | <i>Streptomyces</i> sp. CFMR 7          | 98                      | 89              | 80                       | 66                     | 74                      | 99                      | 91              | 73                       | 68                   | 72                      | bafilomycin         | -                                       |
| 502770800             | n.a.      | <i>Streptomyces scabiei</i>             | -                       | -               | -                        | -                      | -                       | 73                      | 72              | 69                       | 67                   | 98                      | concanamycin        | -                                       |
| 822059630             | 822063703 | <i>Streptomyces stelliscabiei</i>       | 76                      | 76              | 74                       | 69                     | 93                      | 73                      | 72              | 69                       | 67                   | 98                      | concanamycin        | -                                       |
| 943900294             | 943905490 | <i>Streptomyces neyagawaensis</i>       | 74                      | 75              | 73                       | 69                     | 100                     | 73                      | 72              | 69                       | 68                   | 100                     | concanamycin        | -                                       |
| n.a.                  | 899609429 | <i>Streptomyces varsoviensis</i>        | 82                      | 81              | 100                      | 65                     | 73                      | 75                      | 72              | 100                      | 64                   | 67                      | hygrobafilomycin    | hygrobafilomycin                        |
| 491120173             | 491120212 | <i>Streptomyces ghanaensis</i>          | 67                      | 67              | 66                       | 96                     | 68                      | 69                      | 69              | 65                       | 100                  | 68                      | hygrolidin          | hygrolidin                              |
| 515242709             | 515242729 | <i>Streptomyces viroloporus</i> T7A     | 67                      | 67              | 66                       | 96                     | 68                      | 69                      | 69              | 65                       | 100                  | 68                      | hygrolidin          | -                                       |
| 748767887             | 748767878 | <i>Streptomyces</i> sp. 150FB           | 68                      | 67              | 66                       | 86                     | 69                      | 68                      | 68              | 68                       | 79                   | 70                      | hygrolidin          | -                                       |
| n.a.                  | 466860673 | <i>Streptomyces hygrosopicus</i>        | 67                      | 67              | 65                       | 100                    | 69                      | -                       | -               | -                        | -                    | -                       | hygrolidin          | hygrolidin                              |
| 655029786             | 655029979 | <i>Nocardia</i> sp. CNY236              | 71                      | 72              | 68                       | 69                     | 75                      | 71                      | 70              | 65                       | 66                   | 70                      | n.d.                | -                                       |
| 490056513             | 490056911 | <i>Streptomyces clavuligerus</i>        | 70                      | 72              | 74                       | 64                     | 68                      | 70                      | 71              | 70                       | 64                   | 71                      | n.d.                | -                                       |
| 739855312             | n.a.      | <i>Streptomyces</i> sp. AA1529          | -                       | -               | -                        | -                      | -                       | 67                      | 67              | 64                       | 66                   | 69                      | n.d.                | -                                       |
| 739934956             | n.a.      | <i>Streptomyces</i> sp. CNT318          | -                       | -               | -                        | -                      | -                       | 67                      | 67              | 64                       | 66                   | 69                      | n.d.                | -                                       |
| 916734751             | n.a.      | <i>Pseudonocardia spinosipora</i>       | -                       | -               | -                        | -                      | -                       | 64                      | 64              | 62                       | 63                   | 64                      | n.d.                | -                                       |
| 925291620             | 917236896 | <i>Streptomyces caelestis</i>           | 71                      | 71              | 72                       | 65                     | 68                      | 74                      | 75              | 73                       | 67                   | 73                      | n.d.                | -                                       |

## References

- (1) Kitsche, A.; Kalesse, M. "Configurational assignment of secondary hydroxyl groups and methyl branches in polyketide natural products through bioinformatic analysis of the ketoreductase domain" *ChemBioChem* **2013**, *14*, 851.
